# Supplementary material for: Light sets the brain’s daily clock by regional quickening and slowing of the molecular clockworks at dawn and dusk
Source: eLife. 2021 Dec 20;10:e70137. doi: 10.7554/eLife.70137 (PMC8687663; doi:10.7554/eLife.70137)
Supplement: Figure 1—source data 1. [file elife-70137-fig1-data1.xlsx]

## Sheet: Fig. 1
Figure 1B
Sham	Blue	Red
0.949035	0.0186774	0.926061
0.952	0.0202429	0.568228
0.879825	0.0259241	0.667634
