# Supplementary material for: Light sets the brain’s daily clock by regional quickening and slowing of the molecular clockworks at dawn and dusk
Source: eLife. 2021 Dec 20;10:e70137. doi: 10.7554/eLife.70137 (PMC8687663; doi:10.7554/eLife.70137)
Supplement: Figure 2—source data 1. [file elife-70137-fig2-data1.xlsx]

## Sheet: Fig. 2
Figure 2C
CT 6	CT 14	CT 21
0.48	-5.77	5.86
-0.17	-5.23	3.83
0.1	-2.44	2.81
	-3.57	5.02
Figure 2D
CT 6	CT 14	CT 21
0.29	0.77	0.765
0.37	0.595	0.52
0.32	0.765	0.45
	0.675	0.535
Figure 2E
	CT6	CT6	CT6	CT14	CT14	CT14	CT14	CT21	CT21	CT21	CT21
Falling phase	1.07368	1.05487	1.05348	1.38983	1.39879	1.14646	1.28804	0.858491	0.896552	0.929342	0.90709
Rising phase	0.95098	0.961042	0.978682	1.06133	1.09562	0.994924	0.906863	0.645833	0.710699	0.828755	0.673517
Figure 2F
Left				Right
CT 6	CT 14	CT 21		CT 6	CT 14	CT 21
-0.12	0.83	-1.62		-0.1	0.8	-1.8
0.1	1.33	-1.48		0.25	1.15	-1.6
0.1	0.74	-0.9		0.2	1.35	-1.7
	0.74	-2.27			2.55	-2.8
