# Supplementary material for: Light sets the brain’s daily clock by regional quickening and slowing of the molecular clockworks at dawn and dusk
Source: eLife. 2021 Dec 20;10:e70137. doi: 10.7554/eLife.70137 (PMC8687663; doi:10.7554/eLife.70137)
Supplement: Figure 3—figure supplement 2—source data 1. [file elife-70137-fig3-figsupp2-data1.xlsx]

## Sheet: Fig. 3
Figure 3-supplement 2A
No stim	T22	T25
23.85	22.15	25.1
24.1	22.35	25
23.4	22	25.4
24.4	22.25	24.65
	21.95	25.2
		25.25
Figure 3-supplement 2B
No stim	T22	T25
0.25	0.15	0.1
-0.25	0.7	0.95
0.3	-0.5	0.3
0.2	0.35	0.65
	0.1	0.75
		0.55
