# Supplementary material for: Light sets the brain’s daily clock by regional quickening and slowing of the molecular clockworks at dawn and dusk
Source: eLife. 2021 Dec 20;10:e70137. doi: 10.7554/eLife.70137 (PMC8687663; doi:10.7554/eLife.70137)
Supplement: Figure 3—source data 1. [file elife-70137-fig3-data1.xlsx]

## Sheet: Fig. 3
Figure 3B				Figure 3C			Figure 3D
No stim	T22	T25		T22	T25		No stim	T22	T25
23.77	22.11	24.91		11.3	3.95		0.13	0.68	0.23
24.02	22.04	24.91		15.97	4.88		-0.15	0.44	0.85
23.32	21.81	25.21		14.23	4.55		0.29	0.27	0.23
24.56	22.19	24.87		16.88	4.25		0.06	0.13	0.58
	22.11	25		17.33	1.8833			-0.3	0.3
		25.02			1.4333				0.64
Figure 3F
	T22	T22	T22	T22	T22	T25	T25	T25	T25	T25	T25
Falling phase	1.04202	1	0.948718	1.06087	1.16814	1.1017	1.125	1.16949	1.1282	1.23729	1.25
Rising phase	0.783333	0.813953	0.864	0.761905	0.701613	0.974576	0.933884	0.933884	0.965517	0.900826	0.825397
