# Supplementary material for: Light sets the brain’s daily clock by regional quickening and slowing of the molecular clockworks at dawn and dusk
Source: eLife. 2021 Dec 20;10:e70137. doi: 10.7554/eLife.70137 (PMC8687663; doi:10.7554/eLife.70137)
Supplement: Figure 4—figure supplement 2—source data 1. [file elife-70137-fig4-figsupp2-data1.xlsx]

## Sheet: Fig. 4
Figure 4-figure supplement 2A
8:16	12:12	16:8
23.9	24.15	23.8
24.05	24.05	23.8
24.1	24	24.05
Figure 4-figure supplement 2B
8:16	12:12	16:8
0.25	0.35	0.3
0.45	-0.3	0.25
0.7	0.15	0.65
