# Supplementary material for: Light sets the brain’s daily clock by regional quickening and slowing of the molecular clockworks at dawn and dusk
Source: eLife. 2021 Dec 20;10:e70137. doi: 10.7554/eLife.70137 (PMC8687663; doi:10.7554/eLife.70137)
Supplement: Figure 4—source data 1. [file elife-70137-fig4-data1.xlsx]

## Sheet: Fig. 4
Figure 4C
8:16	12:12	16:8
24.16	24	24.08
24	24	23.96
24	23.92	24
Figure 4D
8:16	12:12	16:8
4.52	8.8	6.22
4.19	8.22	4.39
4.44	8.63	3.81
Figure 4E
8:16	12:12	16:8
0.38	-0.04	0.29
0.34	0.31	0.42
0.7	0.26	0.92
Figure 4G
Rising phase duration
	During	During	During	After	After	After
8:16	0.838414	0.864435	0.811102	0.886841	0.99159	1.03961
12:12	0.859016	0.831663	0.933377	0.983374	0.979989	0.999382
16:8	0.706724	0.747832	0.643997	1.11765	0.976913	0.94793
Falling phase duration
	During	During	During	After	After	After
8:16	1.19486	1.07898	1.20872	1.15089	1.02286	0.985571
12:12	1.15021	1.20248	1.0843	1.01475	1.03483	1.01164
16:8	1.28283	1.25228	1.3575	0.900083	1.04107	1.09443
