# Supplementary material for: Light sets the brain’s daily clock by regional quickening and slowing of the molecular clockworks at dawn and dusk
Source: eLife. 2021 Dec 20;10:e70137. doi: 10.7554/eLife.70137 (PMC8687663; doi:10.7554/eLife.70137)
Supplement: Figure 5—source data 1. [file elife-70137-fig5-data1.xlsx]

## Sheet: Fig. 5
Figure 5C
	Entrained	Phase-jumped
12:12	9	0
14:10	8	1
16:8	2	7
