# Supplementary material for: Light sets the brain’s daily clock by regional quickening and slowing of the molecular clockworks at dawn and dusk
Source: eLife. 2021 Dec 20;10:e70137. doi: 10.7554/eLife.70137 (PMC8687663; doi:10.7554/eLife.70137)
Supplement: Figure 6—figure supplement 1—source data 1. [file elife-70137-fig6-figsupp1-data1.xlsx]

## Sheet: Fig. 6
Figure 6-supplement 1A
CT14 stim
Small	Large
6794.64	4642.48
4088.64	2790.91
4834.95	3491.55
3671.25	3275.22
4184.06	3428.18
6943.85	5064.49
Figure 6-supplement 1B
CT21 stim
Small	Large
3243.66	2879.71
3734.77	2671.97
3367.48	2867.26
4275.85	3151.12
4534.86	3532.01
3257.01	2876.25
2364.45	2130.91
