# Supplementary material for: Light sets the brain’s daily clock by regional quickening and slowing of the molecular clockworks at dawn and dusk
Source: eLife. 2021 Dec 20;10:e70137. doi: 10.7554/eLife.70137 (PMC8687663; doi:10.7554/eLife.70137)
Supplement: Figure 6—source data 1. [file elife-70137-fig6-data1.xlsx]

## Sheet: Fig. 6
Figure 6B
CT14 stim			CT21 stim
Pre-stim	Post-stim		Pre-stim	Post-stim
0.029	0.083		0.024	0.03
0.029	0.044		0.028	0.038
0.019	0.034		0.026	0.039
0.023	0.076		0.024	0.026
0.018	0.04		0.038	0.062
0.01	0.029		0.037	0.05
			0.057	0.122
Figure 6D
Phase shift				Period change				Peak time difference
M	L shell	L core		DM	In-btw	VL		Pre-stim	Post-stim
0.716667	-1.11667	-1.28333		0.666667	0.333333	0		1.66667	3.33333
-0.95	-1.28333	-1.28333		0.333333	0.166667	0.166667		1.66667	2.33333
-0.35	-0.683333	-1.35		-0.33333	-0.16667	-0.5		1.33333	1.66667
-0.966667	-1.63333	-1.96667		0.666667	0.833333	0.5		1.66667	2
-0.966667	-1.96667	-2.3		0.166667	0.166667	0		1.66667	2
-1.3	-1.3	-1.63333		0.666667	0.5	0.333333		1	1.66667
Figure 6E
Phase shift				Period change				Peak time difference
DM	VL shell	VL core		D	V shell	V core		Pre-stim	Post-stim
2.91667	2.91667	3.25		-0.83333	-0.66667	-0.83333		1.66667	2.33333
2.55	2.88333	3.55		-1	-0.83333	-0.5		1.66667	2.33333
1.88333	2.55	2.21667		-0.33333	-0.5	-0.33333		1	2
2.71667	2.71667	2.71667		-1.33333	-1	-0.83333		1.33333	2
2.38333	3.05	4.05		-1.16667	-1	-1		2.33333	2.66667
1.66667	2.33333	2.33333		-0.33333	-0.16667	0		2	2.66667
1.31667	0.983333	1.98333		-0.83333	-0.66667	-0.33333		2.33333	3.66667
